# Supplementary material for: Effect of a Single and Triple Dose of Levamisole on Hematological Parameters in Controlled Inflammation Model
Source: MDPI journal article supplement (doi:10.3390/ani12162110), 2022-08-17
Supplement: s1 [file s1]

**Table S1.** The mean values [X], standard deviation [SD] and *p* values of selected hematological parameters between individual groups of rats with carrageenan-induced inflammation after single and triple levamisole application.

| Hematological parameter              | time indicator | IP     |        | Levamisole one dose<br>(LMS I 24 h, LMS I 48 h, LMS I 72 h) |        |                   | Levamisole three doses<br>(LMS II 48 h, LMS III 72 h) |        |                  |
|--------------------------------------|----------------|--------|--------|-------------------------------------------------------------|--------|-------------------|-------------------------------------------------------|--------|------------------|
|                                      |                | X      | SD     | X                                                           | SD     | <i>p</i> (vs. IP) | X                                                     | SD     | <i>p</i> (vs IP) |
| RBC<br>( $\times 10^6/\mu\text{L}$ ) | 24 h           | 6.26   | 1.93   | 5.68                                                        | 0.19   | 0.52              |                                                       |        |                  |
|                                      | 48 h           | 6.23   | 0.78   | 5.55                                                        | 0.78   | 0.16              | 5.37                                                  | 0.23   | 0.04             |
|                                      | 72 h           | 5.19   | 2.29   | 6.86                                                        | 0.66   | 0.08              | 3.51                                                  | 1.33   | 0.09             |
| HGB<br>(g/dL)                        | 24h            | 11.50  | 3.62   | 10.40                                                       | 0.56   | 0.52              |                                                       |        |                  |
|                                      | 48 h           | 11.16  | 1.15   | 10.26                                                       | 0.54   | 0.11              | 9.56                                                  | 0.62   | 0.02             |
|                                      | 72 h           | 9.14   | 4.02   | 13.64                                                       | 1.04   | 0.01              | 6.18                                                  | 2.30   | 0.08             |
| HTC<br>(%)                           | 24 h           | 33.54  | 10.09  | 34.72                                                       | 1.62   | 0.80              |                                                       |        |                  |
|                                      | 48 h           | 34.08  | 2.21   | 34.53                                                       | 2.11   | 0.73              | 31.84                                                 | 1.39   | 0.07             |
|                                      | 72 h           | 28.35  | 10.53  | 38.01                                                       | 3.61   | 0.04              | 21.55                                                 | 7.26   | 0.14             |
| RDW<br>(%)                           | 24 h           | 15.10  | 2.54   | 16.58                                                       | 0.83   | 0.23              |                                                       |        |                  |
|                                      | 48 h           | 16.23  | 1.05   | 16.45                                                       | 0.80   | 0.45              | 16.02                                                 | 1.37   | 0.76             |
|                                      | 72 h           | 16.68  | 0.45   | 16.23                                                       | 0.27   | 0.27              | 16.53                                                 | 1.47   | 0.84             |
| MCV<br>(fL)                          | 24 h           | 53.44  | 4.92   | 61.14                                                       | 1.35   | <0.001            |                                                       |        |                  |
|                                      | 48 h           | 55.17  | 4.16   | 60.11                                                       | 0.63   | 0.01              | 59.34                                                 | 0.52   | 0.05             |
|                                      | 72 h           | 57.15  | 6.18   | 55.41                                                       | 0.78   | 0.48              | 62.34                                                 | 3.17   | 0.05             |
| MCH<br>(pg)                          | 24 h           | 18.40  | 0.85   | 18.30                                                       | 0.66   | 0.82              |                                                       |        |                  |
|                                      | 48 h           | 17.94  | 0.63   | 17.98                                                       | 0.78   | 0.81              | 17.82                                                 | 0.55   | 0.72             |
|                                      | 72 h           | 17.65  | 0.61   | 19.91                                                       | 0.55   | <0.001            | 17.64                                                 | 0.47   | 0.96             |
| MCHC<br>(g/dL)                       | 24 h           | 34.69  | 0.23   | 29.90                                                       | 0.86   | <0.001            |                                                       |        |                  |
|                                      | 48 h           | 32.62  | 0.62   | 30.11                                                       | 0.97   | 0.01              | 30.04                                                 | 0.93   | <0.001           |
|                                      | 72 h           | 31.24  | 0.37   | 35.93                                                       | 0.78   | <0.001            | 28.33                                                 | 1.11   | 0.02             |
| PLT<br>( $\times 10^3/\mu\text{L}$ ) | 24 h           | 560.30 | 242.40 | 627.80                                                      | 115.55 | 0.30              |                                                       |        |                  |
|                                      | 48 h           | 616.10 | 155.10 | 621.30                                                      | 125.00 | 0.46              | 393.40                                                | 68.59  | 0.02             |
|                                      | 72 h           | 672.80 | 158.80 | 905.57                                                      | 76.75  | 0.01              | 359.13                                                | 199.75 | <0.001           |
| MPV<br>(fL)                          | 24 h           | 6.32   | 0.45   | 6.10                                                        | 0.25   | 0.34              |                                                       |        |                  |
|                                      | 48 h           | 6.72   | 0.25   | 6.23                                                        | 0.30   | 0.22              | 6.84                                                  | 0.33   | 0.64             |
|                                      | 72 h           | 6.70   | 0.16   | 6.54                                                        | 0.06   | 0.14              | 6.58                                                  | 0.35   | 0.60             |
| PCT<br>(%)                           | 24 h           | 0.36   | 0.16   | 0.41                                                        | 0.08   | 0.53              |                                                       |        |                  |
|                                      | 48 h           | 0.42   | 0.10   | 0.41                                                        | 0.13   | 0.42              | 0.27                                                  | 0.05   | 0.02             |
|                                      | 72 h           | 0.45   | 0.10   | 0.42                                                        | 0.21   | 0.11              | 0.24                                                  | 0.13   | <0.001           |
| PDW<br>(%)                           | 24 h           | 57.18  | 3.45   | 60.06                                                       | 1.77   | 0.11              |                                                       |        |                  |
|                                      | 48 h           | 55.67  | 3.81   | 58.23                                                       | 3.21   | 0.23              | 56.74                                                 | 2.26   | 0.58             |
|                                      | 72 h           | 55.24  | 3.08   | 57.00                                                       | 3.01   | 0.29              | 61.41                                                 | 5.15   | 0.01             |
| WBC<br>( $\times 10^3/\mu\text{L}$ ) | 24 h           | 3.74   | 2.52   | 6.56                                                        | 0.31   | 0.03              |                                                       |        |                  |
|                                      | 48 h           | 5.76   | 1.36   | 6.98                                                        | 0.25   | 0.05              | 8.07                                                  | 1.12   | 0.01             |
|                                      | 72 h           | 7.77   | 4.06   | 21.78                                                       | 4.44   | <0.001            | 7.93                                                  | 3.10   | 0.93             |

|                                 |      |      |        |      |        |        |      |        |        |
|---------------------------------|------|------|--------|------|--------|--------|------|--------|--------|
| HDW<br>(g/dL)                   | 24 h | 2.26 | 0.15   | 2.06 | 0.08   | 0.16   |      |        |        |
|                                 | 48 h | 4.60 | 2.81   | 2.01 | 0.98   | <0.001 | 1.99 | 0.11   | 0.06   |
|                                 | 72 h | 2.14 | 0.31   | 2.11 | 0.33   | 0.27   | 1.99 | 0.11   | 0.21   |
| NEUT<br>(x10 <sup>3</sup> /μL)  | 24 h | 1.99 | 1.59   | 3.26 | 1.09   | 0.14   |      |        |        |
|                                 | 48 h | 2.89 | 0.28   | 3.16 | 0.55   | 0.13   | 2.72 | 0.93   | 0.78   |
|                                 | 72 h | 3.12 | 0.41   | 3.18 | 0.64   | 0.34   | 2.28 | 1.01   | 0.32   |
| LYMPH<br>(x10 <sup>3</sup> /μL) | 24 h | 1.49 | 1.04   | 2.83 | 0.76   | 0.02   |      |        |        |
|                                 | 48 h | 1.80 | 0.89   | 2.96 | 0.82   | <0.001 | 3.65 | 0.57   | <0.001 |
|                                 | 72 h | 3.49 | 1.95   | 3.96 | 0.63   | 0.15   | 4.22 | 2.10   | 0.48   |
| MONO<br>(x10 <sup>3</sup> /μL)  | 24 h | 0.41 | 0.03   | 0.79 | 0.06   | 0.11   |      |        |        |
|                                 | 48 h | 0.56 | 0.27   | 0.77 | 0.18   | 0.04   | 0.59 | 0.07   | 0.42   |
|                                 | 72 h | 0.58 | 0.24   | 0.58 | 0.24   | 0.33   | 0.58 | 0.05   | 0.02   |
| EOS<br>(x10 <sup>3</sup> /μL)   | 24 h | 0.09 | 0.01   | 0.09 | 0.01   | 0.26   |      |        |        |
|                                 | 48 h | 0.18 | 0.03   | 0.08 | 0.01   | 0.01   | 0.20 | 0.02   | 0.25   |
|                                 | 72 h | 0.07 | <0.001 | 0.21 | 0.02   | <0.001 | 0.09 | 0.01   | 0.04   |
| LUC<br>(x10 <sup>3</sup> /μL)   | 24 h | 0.19 | 0.02   | 0.37 | 0.04   | <0.001 |      |        |        |
|                                 | 48 h | 0.37 | 0.02   | 0.37 | 0.02   | 0.40   | 0.67 | 0.12   | 0.03   |
|                                 | 72 h | 0.50 | 0.03   | 0.65 | 0.05   | 0.02   | 0.62 | 0.04   | 0.02   |
| BASO<br>(x10 <sup>3</sup> /μL)  | 24 h | 0.02 | 0.01   | 0.03 | <0.001 | 0.01   |      |        |        |
|                                 | 48 h | 0.02 | 0.12   | 0.03 | <0.001 | 0.15   | 0.03 | <0.001 | 0.17   |
|                                 | 72 h | 0.02 | 0.01   | 0.03 | <0.001 | 0.10   | 0.02 | <0.001 | 0.43   |
